# Supplementary material
Source: PubMed Central journal article supplement (PMC3314874)
Supplement: 97320630008216S1.pdf [file 97320630008216S1.pdf]

## Supplementary material:

**Table 1:** Mol inspiration analysis of Banana Flower Flavonoids

| SNo | Compound                   | milogP | TPSA    | n atoms | MW     | nON | nOHNH | n violations | n rotb | Volume |
|-----|----------------------------|--------|---------|---------|--------|-----|-------|--------------|--------|--------|
| 1   | LEUCOCYANIDIN              | 0.378  | 130.602 | 22      | 306.27 | 7   | 6     | 1            | 1      | 252.19 |
| 2   | CYANIDIN                   | -0.746 | 112.31  | 21      | 287.25 | 6   | 5     | 0            | 1      | 234.81 |
| 3   | MALVIDIN                   | -0.422 | 110.55  | 24      | 331.3  | 7   | 4     | 0            | 3      | 277.88 |
| 3   | MALVIDIN                   | -0.422 | 110.55  | 24      | 331.3  | 7   | 4     | 0            | 3      | 277.88 |
| 5   | PEONIDIN                   | -0.438 | 101.316 | 22      | 301.27 | 6   | 4     | 0            | 2      | 252.33 |
| 6   | HESPERETIN                 | 1.935  | 96.223  | 22      | 302.28 | 6   | 2     | 0            | 2      | 255.80 |
| 7   | NARINGENIN                 | 2.117  | 86.989  | 20      | 272.26 | 5   | 3     | 0            | 1      | 230.26 |
| 8   | HESPERETIN TRIACETATE      | 2.193  | 114.454 | 32      | 444.44 | 9   | 0     | 0            | 10     | 393.05 |
| 9   | HESPERETIN DIHYDROCHALCONE | 2.475  | 107.217 | 22      | 304.30 | 6   | 4     | 0            | 5      | 265.65 |
| 10  | NARINGENIN FLAVANONE       | -1.146 | 89.818  |         | 271.24 | 5   | 2     | 0            | 1      | 227.51 |
| 11  | NARINGENIN PELARGIDANON    | 2.117  | 86.989  | 20      | 272.26 | 5   | 3     | 0            | 1      | 230.26 |
| 12  | HESPERETIN (ANION)         | -1.327 | 99.052  | 22      | 301.27 | 6   | 2     | 0            | 2      | 253.06 |

**Table 2:** Binding energy values of the docked ligands

| S.No | Name Of Flavonoid          | AUTODOCK.4.0<br>(kcal/mol) | AUTODOCK VINA<br>(kcal/mol) |
|------|----------------------------|----------------------------|-----------------------------|
| 1    | HESPERETIN TRIACETATE      | -6.08                      | -8.2                        |
| 2    | NARINGENIN                 | -6.02                      | -8.1                        |
| 3    | NARINGENIN PELARGONIDIN    | -6.02                      | -8.1                        |
| 4    | NARINGENIN FLAVANONE       | -5.82                      | -8.0                        |
| 5    | HESPERETIN                 | -5.78                      | -8.4                        |
| 6    | MALVIDIN                   | -5.26                      | -7.3                        |
| 7    | CYANIDIN                   | -5.18                      | -7.9                        |
| 8    | PELARGONIDIN               | -4.93                      | -7.7                        |
| 9    | PEONIDIN                   | -4.80                      | -7.7                        |
| 10   | HESPERETIN DIHYDROCHALCONE | -4.78                      | -7.0                        |
